# Supplementary material for: A temporal integration mechanism enhances frequency selectivity of broadband inputs to inferior colliculus
Source: PLoS Biol. 2019 Jun 24;17(6):e2005861. doi: 10.1371/journal.pbio.2005861 (PMC6611646; doi:10.1371/journal.pbio.2005861)
Supplement: S3 Code — (M) [file pbio.2005861.s011.m]

%Script to generate Figure 3 Data - Chen et al - PLOS BIO
%

%LOADING DATA
load S3_Data.mat

%Formating
figure
colormap jet
iL = 37;
markertype1='o';
markertype2='^';
markersize=6;
color1='k';
color2=[1 1 1]*.6;
fontsize=12;

%PANEL A
subplot(221)
plot(Figure3.Panel_a.AdjacentTetrode.BroadBand.PBI,Figure3.Panel_a.AdjacentTetrode.BroadBand.ICN,markertype1,'color',color2,'markersize',markersize)
hold on
plot(Figure3.Panel_a.SameTetrode.BroadBand.PBI,Figure3.Panel_a.SameTetrode.BroadBand.ICN,markertype1,'color',color1,'markersize',markersize)
plot(Figure3.Panel_a.AdjacentTetrode.NarrowBand.PBI,Figure3.Panel_a.AdjacentTetrode.NarrowBand.ICN,markertype2,'color',color2,'markersize',markersize)
plot(Figure3.Panel_a.SameTetrode.NarrowBand.PBI,Figure3.Panel_a.SameTetrode.NarrowBand.ICN,markertype2,'color',color1,'markersize',markersize)
title('BF (octave)');
xlabel('PIN');ylabel('ICN');
plot(0:5,0:5,'k-.')
axis([0 5 0 5]);
set(gca,'box','off');

%PANEL B 
subplot(222)
INTV=[0:0.07:2];
[N1,X]=hist(Figure3.Panel_b.SameTetrode.BFdiff,INTV);
[N2,X]=hist(Figure3.Panel_b.AdjacentTetrode.BFdiff,INTV);
bar(X,N2,'facecolor',color2,'edgecolor','k')
hold on;
bar(X,N1,'facecolor',color1,'edgecolor','k')
ylim([0 45])
%bar(X,([N1; N2]'),1,'stacked')
hold on
plot(Figure3.Panel_b.SumOfGauss.BFDiff,Figure3.Panel_b.SumOfGauss.NumberOfPairs,'k')
XLIM=[-.2 1.2];
xlim(XLIM)
xlabel('BF diff (octave)');
ylabel('Number of pairs');
set(gca,'box','off');


%Formating PANELS C-F
figure
colormap jet
iL = 37;
markertype1='o';
markertype2='^';
markersize=6;
color1='k';
color2=[1 1 1]*.6;
fontsize=12;

%PANEL C
subplot(221)
plot(Figure3.Panel_c.AdjacentTetrode.BroadBand.BFDiff,Figure3.Panel_c.AdjacentTetrode.BroadBand.Contribution,markertype1,'color',color2,'markersize',markersize)
hold on
plot(Figure3.Panel_c.SameTetrode.BroadBand.BFDiff,Figure3.Panel_c.SameTetrode.BroadBand.Contribution,markertype1,'color',color1,'markersize',markersize)
plot(Figure3.Panel_c.AdjacentTetrode.NarrowBand.BFDiff,Figure3.Panel_c.AdjacentTetrode.NarrowBand.Contribution,markertype2,'color',color2,'markersize',markersize)
plot(Figure3.Panel_c.SameTetrode.NarrowBand.BFDiff,Figure3.Panel_c.SameTetrode.NarrowBand.Contribution,markertype2,'color',color1,'markersize',markersize)
xlim(XLIM);
ylim([0 0.4]);
xlabel('BF diff (octave)')
ylabel('Contribution')
set(gca,'box','off');
%set(gca,'yscale','log');


%PANEL D
subplot(222)
plot(Figure3.Panel_d.AdjacentTetrode.BroadBand.BFDiff,Figure3.Panel_d.AdjacentTetrode.BroadBand.Efficacy,markertype1,'color',color2,'markersize',markersize)
hold on
plot(Figure3.Panel_d.SameTetrode.BroadBand.BFDiff,Figure3.Panel_d.SameTetrode.BroadBand.Efficacy,markertype1,'color',color1,'markersize',markersize)
plot(Figure3.Panel_d.AdjacentTetrode.NarrowBand.BFDiff,Figure3.Panel_d.AdjacentTetrode.NarrowBand.Efficacy,markertype2,'color',color2,'markersize',markersize)
plot(Figure3.Panel_d.SameTetrode.NarrowBand.BFDiff,Figure3.Panel_d.SameTetrode.NarrowBand.Efficacy,markertype2,'color',color1,'markersize',markersize)
xlim(XLIM);
ylim([0 0.4]);
xlabel('BF diff (octave)')
ylabel('Efficacy')
set(gca,'box','off');
%set(gca,'yscale','log');

%Panels E
subplot(223)
Group=[ones(size(Figure3.Panel_e.C1.Contribution)) 2*ones(size(Figure3.Panel_e.C2.Contribution))  3*ones(size(Figure3.Panel_e.C3.Contribution)) ];
boxplot([Figure3.Panel_e.C1.Contribution Figure3.Panel_e.C2.Contribution Figure3.Panel_e.C3.Contribution],Group,'notch','on','color','k','symbol','k+')
ylim([0 0.4]);
ylabel('Contribution')

%PANEL F
subplot(224)
Group=[ones(size(Figure3.Panel_f.C1.Efficacy)) 2*ones(size(Figure3.Panel_f.C2.Efficacy))  3*ones(size(Figure3.Panel_f.C3.Efficacy)) ];
boxplot([Figure3.Panel_f.C1.Efficacy Figure3.Panel_f.C2.Efficacy Figure3.Panel_f.C3.Efficacy],Group,'notch','on','color','k','symbol','k+')
ylim([0 0.4]);
ylabel('Efficacy')
set(gca,'box','off');
